# Supplementary material for: Fine-scale haplotype mapping of MUT, AACS, SLC6A15 and PRKCA genes indicates association with insulin resistance of metabolic syndrome and relationship with branched chain amino acid metabolism or regulation
Source: PubMed Central journal article supplement (PMC6435171; doi:10.1371/journal.pone.0214122), 2019-03-26
Supplement: pone.0214122.s002.pdf [file pone.0214122.s002.pdf]

| <b>Genes of BCAA catabolism from KEGG database</b>                          |               |        |               |               |         |
|-----------------------------------------------------------------------------|---------------|--------|---------------|---------------|---------|
| ACADM                                                                       | ALDH9A1       | DBT    | HMGCL         | HMGCS2        | OXCT2   |
| AOX1                                                                        | <b>HADHA</b>  | HADHB  | HIBCH         | MCEE          | ACAA1   |
| EHHADH                                                                      | MCCC1         | PCCB   | HADH          | AGXT2         | ALDH7A1 |
| <b>HMGCS1</b>                                                               | MCCC2         | OXCT1  | ACAT2         | BCKDHB        | HMGCLL1 |
| MUT                                                                         | DLD           | HIBADH | ALDH1B1       | AUH           | ACADSB  |
| ACAD8                                                                       | ACAT1         | AACS   | ACADS         | ALDH2         | BCAT1   |
| PCCA                                                                        | ALDH6A1       | IVD    | ABAT          | <b>ACSF3</b>  | ALDH3A2 |
| ACAA2                                                                       | BCAT2         | BCKDHA | IL4I1         | HSD17B10      | ECHS1   |
| <b>Genes involved in BCAA transport</b>                                     |               |        |               |               |         |
| SLC3A2                                                                      | SLC6A15       | SLC7A7 | SLC7A5 (LAT1) | SLC7A6        | SLC43A2 |
| SLC1A5                                                                      | SLC7A8 (LAT2) |        |               |               |         |
| <b>Gene involved in BCAA regulation or influential on BCAA plasma level</b> |               |        |               |               |         |
| GCKR                                                                        | TRIM63        | ABCD3  | SCP2          | PRKCE         | PDK1    |
| KLF15                                                                       | ACOX2         | PDK4   | FBXO32        | IGF1          | ABCD2   |
| ACAD10                                                                      | TRMT61A       | ABCD4  | PRC1          | <b>DDX19A</b> | CBLN1   |
| ABCA10                                                                      | PRKCA         | ABCD1  | PPM1K         | BCKDK         |         |
