# Supplementary material for: Fine-scale haplotype mapping of MUT, AACS, SLC6A15 and PRKCA genes indicates association with insulin resistance of metabolic syndrome and relationship with branched chain amino acid metabolism or regulation
Source: PubMed Central journal article supplement (PMC6435171; doi:10.1371/journal.pone.0214122), 2019-03-26
Supplement: pone.0214122.s003.pdf [file pone.0214122.s003.pdf]

|                                     | <b>Controls<br/>Non-IR</b> | <b>Cases<br/>IR<sup>c</sup></b> | <b>P value<sup>a</sup></b> |
|-------------------------------------|----------------------------|---------------------------------|----------------------------|
| <i>n</i>                            | 338                        | 127                             | NA                         |
| Gender (Females/Males)              | 308/30                     | 108/19                          | NS                         |
| Age (years)                         | 44.49 ± 1.25               | 49.69 ± 1.15                    | < 0.0034                   |
| BMI (kg/m <sup>2</sup> )            | 25.21 ± 0.36               | 34.95 ± 0.69                    | < 0.0001                   |
| Waist (cm)                          | 90.84 ± 1.41               | 107.55 ± 1.57                   | < 0.0001                   |
| Fasting Glucose (mmol/L)            | 4.93 ± 0.09                | 6.20 ± 1.19                     | < 0.0001                   |
| Fasting insulin (mU/mL)             | 7.77 ± 0.89                | 20.20 ± 1.18                    | < 0.0001                   |
| Hyperglycemia (%) <sup>b</sup>      | 12.13                      | 57.48                           | < 0.0001                   |
| HOMA <sub>IR</sub>                  | 1.67 ± 0.18                | 5.24 ± 0.30                     | < 0.0001                   |
| SBP (mmHg)                          | 124.56 ± 2.20              | 137.71 ± 2.10                   | < 0.0001                   |
| DBP (mmHg)                          | 76.55 ± 1.51               | 81.99 ± 1.37                    | <0.0087                    |
| Triglycerides (mmol/L)              | 1.20 ± 0.06                | 1.89 ± 0.11                     | < 0.0001                   |
| HDL-cholesterol (mmol/L)            | 1.36 ± 0.04                | 1.23 ± 0.03                     | < 0.011                    |
| Obesity (%) <sup>d</sup>            | 19.8                       | 75.59                           | < 0.0001                   |
| Hypertension (%) <sup>b</sup>       | 38.46                      | 77.95                           | < 0.0001                   |
| High Triglycerides (%) <sup>b</sup> | 24.85                      | 57.48                           | < 0.0001                   |
| Low HDL (%) <sup>b</sup>            | 14.49                      | 49.60                           | < 0.0001                   |
