# Supplementary material for: Fine-scale haplotype mapping of MUT, AACS, SLC6A15 and PRKCA genes indicates association with insulin resistance of metabolic syndrome and relationship with branched chain amino acid metabolism or regulation
Source: PubMed Central journal article supplement (PMC6435171; doi:10.1371/journal.pone.0214122), 2019-03-26
Supplement: pone.0214122.s004.pdf [file pone.0214122.s004.pdf]

| Chr | Position of the first SNP | Haplotype | Frequency |          | P-value               | OR   | 95% CI |       | Location           |
|-----|---------------------------|-----------|-----------|----------|-----------------------|------|--------|-------|--------------------|
|     |                           |           | cases     | controls |                       |      | lower  | upper |                    |
| 12  | 84570410                  | GGAA      | 0.56      | 0.41     | $3.73 \times 10^{-5}$ | 1.80 | 1.35   | 2.41  | Downstream SCL6A15 |
| 12  | 84570986                  | GAAG      | 0.56      | 0.41     | $4.32 \times 10^{-5}$ | 1.79 | 1.34   | 2.40  | Downstream SCL6A15 |
| 17  | 64786516                  | X,G,A,A   | 0.01      | 0.05     | $4.49 \times 10^{-5}$ | 0.11 | 0.02   | 0.56  | PRKCA              |
| 17  | 64789936                  | GAAC      | 0.01      | 0.05     | $4.52 \times 10^{-5}$ | 0.11 | 0.02   | 0.56  | PRKCA              |
| 12  | 125651199                 | TATT      | 0.37      | 0.51     | $4.55 \times 10^{-5}$ | 0.54 | 0.40   | 0.73  | Downstream AACS**  |
| 12  | 125650120                 | TTAT      | 0.37      | 0.51     | $4.55 \times 10^{-5}$ | 0.54 | 0.40   | 0.73  | Downstream AACS    |
| 12  | 125656263                 | CACT      | 0.41      | 0.56     | $4.93 \times 10^{-5}$ | 0.55 | 0.41   | 0.74  | Downstream AACS    |
| 12  | 125651631                 | TTCA      | 0.37      | 0.52     | $5.40 \times 10^{-5}$ | 0.55 | 0.41   | 0.74  | Downstream AACS    |
| 12  | 125652337                 | TACC      | 0.37      | 0.52     | $5.40 \times 10^{-5}$ | 0.55 | 0.41   | 0.74  | Downstream AACS    |
| 12  | 125651442                 | ATTC      | 0.37      | 0.52     | $5.40 \times 10^{-5}$ | 0.55 | 0.41   | 0.73  | Downstream AACS    |
| 12  | 125653091                 | ACCT      | 0.37      | 0.52     | $5.40 \times 10^{-5}$ | 0.55 | 0.41   | 0.74  | Downstream AACS    |
| 17  | 64790434                  | AACA      | 0.01      | 0.05     | $5.61 \times 10^{-5}$ | 0.11 | 0.02   | 0.55  | PRKCA              |
| 12  | 125648159                 | TGGC      | 0.37      | 0.52     | $6.16 \times 10^{-5}$ | 0.55 | 0.41   | 0.74  | Downstream AACS    |
| 12  | 125647392                 | ACTC      | 0.37      | 0.52     | $6.16 \times 10^{-5}$ | 0.55 | 0.41   | 0.74  | Downstream AACS    |
| 12  | 125646451                 | CACT      | 0.37      | 0.52     | $6.28 \times 10^{-5}$ | 0.55 | 0.41   | 0.74  | Downstream AACS    |
| 6   | 48282957                  | CATG      | 0.13      | 0.25     | $6.29 \times 10^{-5}$ | 0.46 | 0.31   | 0.69  | Downstream MUT     |
| 6   | 48280842                  | CCAT      | 0.13      | 0.24     | $7.05 \times 10^{-5}$ | 0.46 | 0.31   | 0.69  | Downstream MUT     |
| 6   | 48287802                  | ATGT      | 0.13      | 0.25     | $7.10 \times 10^{-5}$ | 0.46 | 0.31   | 0.69  | Downstream MUT     |
| 12  | 103149066                 | CGCC      | 0.32      | 0.45     | $7.80 \times 10^{-5}$ | 0.58 | 0.44   | 0.76  | Upstream IGF1*     |
| 12  | 103148974                 | CCGC      | 0.32      | 0.45     | $7.80 \times 10^{-5}$ | 0.58 | 0.44   | 0.76  | Upstream IGF1*     |
| 6   | 48288218                  | TGTC      | 0.13      | 0.25     | $8.48 \times 10^{-5}$ | 0.46 | 0.31   | 0.70  | Downstream MUT     |
| 6   | 48329893                  | CCGA      | 0.14      | 0.25     | $9.39 \times 10^{-5}$ | 0.46 | 0.31   | 0.70  | Downstream MUT     |
| 16  | 8770320                   | GAAC      | 0.13      | 0.24     | $9.39 \times 10^{-5}$ | 0.47 | 0.31   | 0.70  | ABAT               |
