# Supplementary material for: Fine-scale haplotype mapping of MUT, AACS, SLC6A15 and PRKCA genes indicates association with insulin resistance of metabolic syndrome and relationship with branched chain amino acid metabolism or regulation
Source: PubMed Central journal article supplement (PMC6435171; doi:10.1371/journal.pone.0214122), 2019-03-26
Supplement: pone.0214122.s005.pdf [file pone.0214122.s005.pdf]

| SNP ID       | Position  | Chr | Closest gene <sup>a</sup> | Minor/Major allele |   | MAF  | G/I | P-value Regression <sup>c</sup> | Bonferroni            | FDR                   | Replication P-value <sup>d</sup> | OR   | 95% CI |       |
|--------------|-----------|-----|---------------------------|--------------------|---|------|-----|---------------------------------|-----------------------|-----------------------|----------------------------------|------|--------|-------|
|              |           |     |                           |                    |   |      |     |                                 |                       |                       |                                  |      | lower  | upper |
| rs17674678   | 48174498  | 6   | C6orf138/MUT              | G                  | A | 0.13 | G   | $2.23 \times 10^{-3}$           | NS                    | $2.21 \times 10^{-2}$ | $3.18 \times 10^{-2}$            | 0.47 | 0.28   | 0.79  |
| rs2167284*   | 48288218  | 6   | C6orf138/MUT              | T                  | C | 0.22 | G   | $1.27 \times 10^{-4}$           | $1.40 \times 10^{-2}$ | $1.39 \times 10^{-2}$ | $2.89 \times 10^{-2}$            | 0.47 | 0.32   | 0.71  |
| rs325041     | 48329893  | 6   | C6orf138/MUT              | C                  | A | 0.35 | G   | $6.73 \times 10^{-3}$           | NS                    | $3.33 \times 10^{-2}$ | $9.54 \times 10^{-2}$            | 0.65 | 0.47   | 0.89  |
| rs17762314   | 64675899  | 17  | PRKCA (within gene)       | G                  | A | 0.30 | I   | $4.36 \times 10^{-3}$           | NS                    | $2.26 \times 10^{-2}$ | $4.34 \times 10^{-1}$            | 1.57 | 1.15   | 2.13  |
| rs2052193    | 64677193  | 17  | PRKCA (within gene)       | T                  | A | 0.46 | I   | $8.71 \times 10^{-3}$           | NS                    | $4.13 \times 10^{-2}$ | $9.14 \times 10^{-1}$            | 0.68 | 0.50   | 0.91  |
| rs9902356*   | 64679742  | 17  | PRKCA (within gene)       | C                  | G | 0.12 | I   | $3.47 \times 10^{-4}$           | $3.82 \times 10^{-2}$ | $9.46 \times 10^{-3}$ | $1.44 \times 10^{-2}$            | 2.12 | 1.42   | 3.17  |
| rs78518692*  | 64808034  | 17  | PRKCA                     | A                  | G | 0.06 | G   | $3.27 \times 10^{-4}$           | $3.60 \times 10^{-2}$ | $1.19 \times 10^{-2}$ | $1.44 \times 10^{-2}$            | 0.24 | 0.10   | 0.61  |
| rs4791033*   | 64810389  | 17  | PRKCA                     | A                  | G | 0.06 | I   | $1.46 \times 10^{-4}$           | $1.61 \times 10^{-2}$ | $7.96 \times 10^{-3}$ | $1.06 \times 10^{-2}$            | 0.20 | 0.07   | 0.56  |
| rs118009757  | 64814470  | 17  | PRKCA                     | A                  | G | 0.05 | I   | $4.33 \times 10^{-4}$           | $4.77 \times 10^{-2}$ | $6.75 \times 10^{-3}$ | $1.81 \times 10^{-2}$            | 0.22 | 0.08   | 0.62  |
| rs28450079   | 64815228  | 17  | PRKCA                     | T                  | C | 0.05 | I   | $4.33 \times 10^{-4}$           | $4.77 \times 10^{-2}$ | $6.75 \times 10^{-3}$ | $1.81 \times 10^{-2}$            | 0.22 | 0.08   | 0.62  |
| rs2362711    | 64815699  | 17  | PRKCA                     | T                  | G | 0.05 | I   | $4.33 \times 10^{-4}$           | $4.77 \times 10^{-2}$ | $6.75 \times 10^{-3}$ | $1.81 \times 10^{-2}$            | 0.22 | 0.08   | 0.62  |
| rs2403183*\$ | 84567611  | 12  | SLC6A15                   | G                  | C | 0.50 | I   | $2.24 \times 10^{-3}$           | NS                    | $1.22 \times 10^{-2}$ | $3.58 \times 10^{-3}$            | 0.64 | 0.48   | 0.85  |
| rs73233312   | 125685471 | 12  | AACS                      | T                  | C | 0.06 | G   | $8.86 \times 10^{-4}$           | NS                    | $1.07 \times 10^{-2}$ | $2.55 \times 10^{-2}$            | 0.26 | 0.10   | 0.67  |
| rs4442602*   | 125710951 | 12  | AACS                      | T                  | C | 0.29 | G   | $1.32 \times 10^{-3}$           | NS                    | $1.44 \times 10^{-2}$ | $6.20 \times 10^{-3}$            | 1.66 | 1.22   | 2.25  |
| rs10846850*  | 125715717 | 12  | AACS                      | T                  | C | 0.13 | G   | $7.65 \times 10^{-4}$           | NS                    | $1.04 \times 10^{-2}$ | $1.34 \times 10^{-2}$            | 0.43 | 0.26   | 0.73  |
| rs12818316   | 125737328 | 12  | TMEM132B/AACS             | T                  | C | 0.27 | G   | $1.00 \times 10^{-2}$           | NS                    | $4.54 \times 10^{-2}$ | $4.18 \times 10^{-2}$            | 1.52 | 1.11   | 2.08  |
| rs61943077   | 125746191 | 12  | TMEM132B/AACS             | A                  | G | 0.36 | G   | $1.10 \times 10^{-2}$           | NS                    | $4.79 \times 10^{-2}$ | $5.10 \times 10^{-2}$            | 0.67 | 0.49   | 0.92  |
