# Supplementary material for: Fine-scale haplotype mapping of MUT, AACS, SLC6A15 and PRKCA genes indicates association with insulin resistance of metabolic syndrome and relationship with branched chain amino acid metabolism or regulation
Source: PubMed Central journal article supplement (PMC6435171; doi:10.1371/journal.pone.0214122), 2019-03-26
Supplement: pone.0214122.s006.pdf [file pone.0214122.s006.pdf]

| SNP ID      | Position | Chr | Closest gene <sup>a</sup> | Minor allele <sup>b</sup> | Major allele | MAF  | G/I | P-value regression <sup>c</sup> | Bonferroni              | FDR                     | OR   | 95% CI |       |
|-------------|----------|-----|---------------------------|---------------------------|--------------|------|-----|---------------------------------|-------------------------|-------------------------|------|--------|-------|
|             |          |     |                           |                           |              |      |     |                                 |                         |                         |      | lower  | upper |
| rs1199183   | 48152123 | 6   | C6orf138/MUT              | T                         | C            | 0.25 | G   | 1.73 x 10 <sup>-1</sup>         | NS                      | NS                      | 1.26 | 0.91   | 1.74  |
| rs10948402  | 48156101 | 6   | C6orf138/MUT              | A                         | C            | 0.29 | G   | 9.90 x 10 <sup>-1</sup>         | NS                      | NS                      | 1.00 | 0.73   | 1.38  |
| rs753849    | 48160865 | 6   | C6orf138/MUT              | G                         | A            | 0.43 | G   | 9.92 x 10 <sup>-1</sup>         | NS                      | NS                      | 1.00 | 0.75   | 1.34  |
| rs17674678  | 48174498 | 6   | C6orf138/MUT              | G                         | A            | 0.13 | G   | 2.23 x 10 <sup>-3</sup>         | NS                      | 2.21 x 10 <sup>-2</sup> | 0.47 | 0.28   | 0.79  |
| rs12527508  | 48195385 | 6   | C6orf138/MUT              | A                         | G            | 0.43 | G   | 7.22 x 10 <sup>-2</sup>         | NS                      | NS                      | 0.76 | 0.57   | 1.03  |
| rs62408552  | 48205578 | 6   | C6orf138/MUT              | G                         | A            | 0.11 | G   | 1.35 x 10 <sup>-1</sup>         | NS                      | NS                      | 0.68 | 0.41   | 1.14  |
| rs2503674   | 48228338 | 6   | C6orf138/MUT              | T                         | C            | 0.08 | G   | 4.21 x 10 <sup>-2</sup>         | NS                      | NS                      | 0.53 | 0.28   | 1.01  |
| rs79741232  | 48230854 | 6   | C6orf138/MUT              | A                         | G            | 0.03 | G   | 9.59 x 10 <sup>-1</sup>         | NS                      | NS                      | 0.98 | 0.41   | 2.35  |
| rs12208936  | 48280842 | 6   | C6orf138/MUT              | T                         | C            | 0.09 | G   | 4.27 x 10 <sup>-2</sup>         | NS                      | NS                      | 1.63 | 1.03   | 2.58  |
| rs616178    | 48282957 | 6   | C6orf138/MUT              | A                         | C            | 0.08 | G   | 2.11 x 10 <sup>-1</sup>         | NS                      | NS                      | 1.40 | 0.83   | 2.34  |
| rs689261    | 48287802 | 6   | C6orf138/MUT              | G                         | A            | 0.50 | G   | 8.91 x 10 <sup>-2</sup>         | NS                      | NS                      | 1.28 | 0.96   | 1.72  |
| rs2167284   | 48288218 | 6   | C6orf138/MUT              | T                         | C            | 0.22 | G   | 1.27 x 10 <sup>-4</sup>         | 1.40 x 10 <sup>-2</sup> | 1.39 x 10 <sup>-2</sup> | 0.47 | 0.32   | 0.71  |
| rs525511    | 48289027 | 6   | C6orf138/MUT              | T                         | G            | 0.29 | G   | 9.96 x 10 <sup>-2</sup>         | NS                      | NS                      | 1.30 | 0.95   | 1.78  |
| rs1889757   | 48289514 | 6   | C6orf138/MUT              | C                         | T            | 0.11 | G   | 8.06 x 10 <sup>-2</sup>         | NS                      | NS                      | 1.48 | 0.96   | 2.28  |
| rs2396859   | 48300857 | 6   | C6orf138/MUT              | T                         | C            | 0.27 | G   | 9.37 x 10 <sup>-1</sup>         | NS                      | NS                      | 1.01 | 0.73   | 1.40  |
| rs325337    | 48321824 | 6   | C6orf138/MUT              | G                         | A            | 0.23 | G   | 1.52 x 10 <sup>-1</sup>         | NS                      | NS                      | 1.28 | 0.92   | 1.78  |
| rs76185631  | 48322656 | 6   | C6orf138/MUT              | T                         | C            | 0.08 | G   | 7.70 x 10 <sup>-1</sup>         | NS                      | NS                      | 0.92 | 0.54   | 1.59  |
| rs325041    | 48329893 | 6   | C6orf138/MUT              | C                         | A            | 0.35 | G   | 6.73 x 10 <sup>-3</sup>         | NS                      | 3.33 x 10 <sup>-2</sup> | 0.65 | 0.47   | 0.89  |
| rs6458607   | 48346488 | 6   | C6orf138/MUT              | T                         | C            | 0.15 | G   | 3.93 x 10 <sup>-1</sup>         | NS                      | NS                      | 1.19 | 0.80   | 1.78  |
| rs35163082  | 48357970 | 6   | C6orf138/MUT              | A                         | G            | 0.02 | G   | 2.94 x 10 <sup>-2</sup>         | NS                      | NS                      | 0.17 | 0.02   | 1.33  |
| rs114337315 | 48364413 | 6   | C6orf138/MUT              | G                         | A            | 0.06 | G   | 4.05 x 10 <sup>-1</sup>         | NS                      | NS                      | 1.29 | 0.71   | 2.35  |
| rs6941242   | 48371928 | 6   | C6orf138/MUT              | T                         | C            | 0.04 | G   | 5.30 x 10 <sup>-1</sup>         | NS                      | NS                      | 0.78 | 0.35   | 1.74  |
| rs11966079  | 48383311 | 6   | C6orf138/MUT              | T                         | C            | 0.14 | G   | 4.78 x 10 <sup>-1</sup>         | NS                      | NS                      | 0.86 | 0.56   | 1.32  |
| rs325286    | 48387129 | 6   | C6orf138/MUT              | T                         | C            | 0.45 | G   | 3.34 x 10 <sup>-2</sup>         | NS                      | NS                      | 0.73 | 0.54   | 0.98  |
| rs17762314  | 64675899 | 17  | PRKCA (within gene)       | G                         | A            | 0.30 | I   | 4.36 x 10 <sup>-3</sup>         | NS                      | 2.26 x 10 <sup>-2</sup> | 1.57 | 1.15   | 2.13  |
| rs11651627  | 64675914 | 17  | PRKCA (within gene)       | T                         | A            | 0.38 | I   | 1.04 x 10 <sup>-1</sup>         | NS                      | NS                      | 0.78 | 0.58   | 1.05  |
| rs10491203  | 64676059 | 17  | PRKCA (within gene)       | G                         | A            | 0.09 | I   | 1.92 x 10 <sup>-1</sup>         | NS                      | NS                      | 0.70 | 0.40   | 1.22  |
| rs10491202  | 64676229 | 17  | PRKCA (within gene)       | C                         | G            | 0.16 | I   | 4.07 x 10 <sup>-1</sup>         | NS                      | NS                      | 1.18 | 0.80   | 1.72  |
| rs8071795   | 64676380 | 17  | PRKCA (within gene)       | C                         | T            | 0.09 | I   | 1.02 x 10 <sup>-1</sup>         | NS                      | NS                      | 0.64 | 0.37   | 1.11  |
| rs2052193   | 64677193 | 17  | PRKCA (within gene)       | T                         | A            | 0.46 | I   | 8.71 x 10 <sup>-3</sup>         | NS                      | 4.13 x 10 <sup>-2</sup> | 0.68 | 0.50   | 0.91  |
| rs9902356   | 64679742 | 17  | PRKCA (within gene)       | C                         | G            | 0.12 | I   | 3.47 x 10 <sup>-4</sup>         | 3.82 x 10 <sup>-2</sup> | 9.46 x 10 <sup>-3</sup> | 2.12 | 1.42   | 3.17  |
| rs11868882  | 64680301 | 17  | PRKCA (within gene)       | G                         | C            | 0.22 | I   | 9.76 x 10 <sup>-1</sup>         | NS                      | NS                      | 0.99 | 0.70   | 1.41  |
| rs16960009  | 64681102 | 17  | PRKCA (within gene)       | T                         | G            | 0.08 | G   | 4.33 x 10 <sup>-2</sup>         | NS                      | NS                      | 1.70 | 1.03   | 2.81  |
| rs8070293   | 64682078 | 17  | PRKCA (within gene)       | T                         | C            | 0.24 | I   | 1.21 x 10 <sup>-1</sup>         | NS                      | NS                      | 1.30 | 0.94   | 1.81  |
| rs8070556   | 64682079 | 17  | PRKCA (within gene)       | T                         | G            | 0.06 | I   | 4.68 x 10 <sup>-1</sup>         | NS                      | NS                      | 0.80 | 0.43   | 1.48  |
| rs7224351   | 64684037 | 17  | PRKCA (within gene)       | G                         | A            | 0.40 | I   | 1.64 x 10 <sup>-2</sup>         | NS                      | NS                      | 0.69 | 0.51   | 0.94  |
| rs17689224  | 64684265 | 17  | PRKCA (within gene)       | T                         | C            | 0.22 | I   | 7.08 x 10 <sup>-1</sup>         | NS                      | NS                      | 1.07 | 0.76   | 1.51  |
| rs1010546   | 64684565 | 17  | PRKCA (within gene)       | T                         | C            | 0.14 | G   | 3.29 x 10 <sup>-1</sup>         | NS                      | NS                      | 1.23 | 0.82   | 1.85  |
| rs1010545   | 64684642 | 17  | PRKCA (within gene)       | C                         | T            | 0.36 | G   | 3.41 x 10 <sup>-1</sup>         | NS                      | NS                      | 1.16 | 0.86   | 1.56  |
| rs16960016  | 64685001 | 17  | PRKCA (within gene)       | T                         | C            | 0.06 | I   | 3.37 x 10 <sup>-1</sup>         | NS                      | NS                      | 0.74 | 0.39   | 1.39  |

|             |          |    |                     |   |   |      |   |                         |                         |                         |      |      |      |
|-------------|----------|----|---------------------|---|---|------|---|-------------------------|-------------------------|-------------------------|------|------|------|
| rs2227857   | 64685078 | 17 | PRKCA (within gene) | A | G | 0.36 | G | 3.01 x 10 <sup>-1</sup> | NS                      | NS                      | 1.17 | 0.87 | 1.58 |
| rs2286958   | 64685390 | 17 | PRKCA (within gene) | G | C | 0.40 | I | 1.64 x 10 <sup>-2</sup> | NS                      | NS                      | 0.69 | 0.51 | 0.94 |
| rs8072511   | 64686036 | 17 | PRKCA (within gene) | G | C | 0.06 | I | 3.37 x 10 <sup>-1</sup> | NS                      | NS                      | 0.74 | 0.39 | 1.39 |
| rs8072920   | 64686048 | 17 | PRKCA (within gene) | G | A | 0.40 | I | 1.64 x 10 <sup>-2</sup> | NS                      | NS                      | 0.69 | 0.51 | 0.94 |
| rs11869446  | 64686545 | 17 | PRKCA (within gene) | T | C | 0.17 | I | 6.16 x 10 <sup>-1</sup> | NS                      | NS                      | 1.10 | 0.76 | 1.61 |
| rs7220480   | 64686679 | 17 | PRKCA (within gene) | G | A | 0.38 | I | 3.42 x 10 <sup>-2</sup> | NS                      | NS                      | 1.37 | 1.02 | 1.84 |
| rs78518692  | 64808034 | 17 | PRKCA               | A | G | 0.06 | G | 3.27 x 10 <sup>-4</sup> | 3.60 x 10 <sup>-2</sup> | 1.19 x 10 <sup>-2</sup> | 0.24 | 0.10 | 0.61 |
| rs7208993   | 64809487 | 17 | PRKCA               | T | C | 0.07 | I | 2.75 x 10 <sup>-2</sup> | NS                      | NS                      | 1.83 | 1.08 | 3.10 |
| rs4791033   | 64810389 | 17 | PRKCA               | A | G | 0.06 | I | 1.46 x 10 <sup>-4</sup> | 1.61 x 10 <sup>-2</sup> | 7.96 x 10 <sup>-3</sup> | 0.20 | 0.07 | 0.56 |
| rs71379997  | 64811585 | 17 | PRKCA               | G | A | 0.07 | I | 4.28 x 10 <sup>-2</sup> | NS                      | NS                      | 1.74 | 1.03 | 2.93 |
| rs12603061  | 64812198 | 17 | PRKCA               | A | G | 0.42 | G | 4.07 x 10 <sup>-2</sup> | NS                      | NS                      | 1.35 | 1.01 | 1.81 |
| rs9910304   | 64813153 | 17 | PRKCA               | A | G | 0.07 | I | 2.72 x 10 <sup>-2</sup> | NS                      | NS                      | 1.81 | 1.08 | 3.04 |
| rs35200121  | 64814251 | 17 | PRKCA               | A | G | 0.07 | G | 4.28 x 10 <sup>-2</sup> | NS                      | NS                      | 1.74 | 1.03 | 2.93 |
| rs118009757 | 64814470 | 17 | PRKCA               | A | G | 0.05 | I | 4.33 x 10 <sup>-4</sup> | 4.77 x 10 <sup>-2</sup> | 6.75 x 10 <sup>-3</sup> | 0.22 | 0.08 | 0.62 |
| rs36011047  | 64814481 | 17 | PRKCA               | T | C | 0.07 | I | 4.28 x 10 <sup>-2</sup> | NS                      | NS                      | 1.74 | 1.03 | 2.93 |
| rs9898120   | 64815009 | 17 | PRKCA               | A | G | 0.07 | I | 2.72 x 10 <sup>-2</sup> | NS                      | NS                      | 1.81 | 1.08 | 3.04 |
| rs28450079  | 64815228 | 17 | PRKCA               | T | C | 0.05 | I | 4.33 x 10 <sup>-4</sup> | 4.77 x 10 <sup>-2</sup> | 6.75 x 10 <sup>-3</sup> | 0.22 | 0.08 | 0.62 |
| rs2362711   | 64815699 | 17 | PRKCA               | T | G | 0.05 | I | 4.33 x 10 <sup>-4</sup> | 4.77 x 10 <sup>-2</sup> | 6.75 x 10 <sup>-3</sup> | 0.22 | 0.08 | 0.62 |
| rs16960252  | 64816194 | 17 | PRKCA               | A | G | 0.07 | I | 3.45 x 10 <sup>-2</sup> | NS                      | NS                      | 1.78 | 1.06 | 3.01 |
| rs34169044  | 64816852 | 17 | PRKCA               | A | C | 0.07 | G | 4.08 x 10 <sup>-2</sup> | NS                      | NS                      | 1.75 | 1.04 | 2.94 |
| rs8077180   | 64817092 | 17 | PRKCA               | C | T | 0.07 | I | 2.72 x 10 <sup>-2</sup> | NS                      | NS                      | 1.81 | 1.08 | 3.04 |
| rs9892428   | 64817409 | 17 | PRKCA               | A | G | 0.07 | I | 2.72 x 10 <sup>-2</sup> | NS                      | NS                      | 1.81 | 1.08 | 3.04 |
| rs2086621   | 84566349 | 12 | SLC6A15             | A | G | 0.23 | I | 2.05 x 10 <sup>-1</sup> | NS                      | NS                      | 0.80 | 0.56 | 1.14 |
| rs2403182   | 84566386 | 12 | SLC6A15             | A | T | 0.23 | I | 2.22 x 10 <sup>-1</sup> | NS                      | NS                      | 0.80 | 0.56 | 1.15 |
| rs732438    | 84566672 | 12 | SLC6A15             | T | C | 0.16 | I | 1.61 x 10 <sup>-2</sup> | NS                      | NS                      | 0.60 | 0.39 | 0.92 |
| rs2403183   | 84567611 | 12 | SLC6A15             | G | C | 0.50 | I | 2.24 x 10 <sup>-3</sup> | NS                      | 1.22 x 10 <sup>-2</sup> | 0.64 | 0.48 | 0.85 |
| rs2403184   | 84567642 | 12 | SLC6A15             | G | A | 0.50 | I | 2.24 x 10 <sup>-3</sup> | NS                      | 1.22 x 10 <sup>-2</sup> | 0.64 | 0.48 | 0.85 |
| rs2086622   | 84567897 | 12 | SLC6A15             | A | G | 0.23 | I | 2.22 x 10 <sup>-1</sup> | NS                      | NS                      | 0.80 | 0.56 | 1.15 |
| rs1384320   | 84568175 | 12 | SLC6A15             | G | C | 0.50 | I | 2.24 x 10 <sup>-3</sup> | NS                      | 1.22 x 10 <sup>-2</sup> | 0.64 | 0.48 | 0.85 |
| rs1384321   | 84568301 | 12 | SLC6A15             | A | C | 0.50 | I | 2.24 x 10 <sup>-3</sup> | NS                      | 1.22 x 10 <sup>-2</sup> | 0.64 | 0.48 | 0.85 |
| rs79588760  | 84568408 | 12 | SLC6A15             | T | C | 0.02 | I | 4.89 x 10 <sup>-1</sup> | NS                      | NS                      | 1.49 | 0.49 | 4.48 |
| rs1482441   | 84569019 | 12 | SLC6A15             | T | C | 0.50 | I | 2.24 x 10 <sup>-3</sup> | NS                      | 1.22 x 10 <sup>-2</sup> | 0.64 | 0.48 | 0.85 |
| rs7301137   | 84569037 | 12 | SLC6A15             | C | T | 0.16 | I | 1.61 x 10 <sup>-2</sup> | NS                      | NS                      | 0.60 | 0.39 | 0.92 |
| rs10862831  | 84570126 | 12 | SLC6A15             | T | A | 0.50 | I | 2.24 x 10 <sup>-3</sup> | NS                      | 1.22 x 10 <sup>-2</sup> | 0.64 | 0.48 | 0.85 |
| rs7970932   | 84570410 | 12 | SLC6A15             | T | G | 0.33 | I | 8.12 x 10 <sup>-2</sup> | NS                      | NS                      | 0.76 | 0.55 | 1.04 |
| rs11116241  | 84570986 | 12 | SLC6A15             | T | G | 0.10 | I | 3.32 x 10 <sup>-1</sup> | NS                      | NS                      | 0.78 | 0.47 | 1.30 |
| rs77813835  | 84571186 | 12 | SLC6A15             | G | A | 0.06 | I | 2.30 x 10 <sup>-1</sup> | NS                      | NS                      | 0.68 | 0.35 | 1.30 |
| rs10746314  | 84571480 | 12 | SLC6A15             | A | G | 0.23 | I | 2.22 x 10 <sup>-1</sup> | NS                      | NS                      | 0.80 | 0.56 | 1.15 |
| rs10735470  | 84571554 | 12 | SLC6A15             | C | T | 0.23 | I | 2.05 x 10 <sup>-1</sup> | NS                      | NS                      | 0.80 | 0.56 | 1.14 |
| rs10779081  | 84572013 | 12 | SLC6A15             | T | C | 0.50 | I | 2.24 x 10 <sup>-3</sup> | NS                      | 1.22 x 10 <sup>-2</sup> | 0.64 | 0.48 | 0.85 |
| rs7315066   | 84572979 | 12 | SLC6A15             | A | G | 0.23 | I | 2.05 x 10 <sup>-1</sup> | NS                      | NS                      | 0.80 | 0.56 | 1.14 |
| rs10779082  | 84573084 | 12 | SLC6A15             | G | A | 0.17 | G | 8.43 x 10 <sup>-2</sup> | NS                      | NS                      | 1.40 | 0.96 | 2.04 |
| rs7315418   | 84573238 | 12 | SLC6A15             | A | G | 0.12 | I | 7.04 x 10 <sup>-1</sup> | NS                      | NS                      | 1.09 | 0.70 | 1.69 |

|            |           |    |               |   |   |      |   |                       |    |                       |      |      |      |
|------------|-----------|----|---------------|---|---|------|---|-----------------------|----|-----------------------|------|------|------|
| rs10779083 | 84573381  | 12 | SLC6A15       | T | C | 0.50 | I | $2.24 \times 10^{-3}$ | NS | $1.22 \times 10^{-2}$ | 0.64 | 0.48 | 0.85 |
| rs79558964 | 84573419  | 12 | SLC6A15       | C | T | 0.04 | I | $1.15 \times 10^{-1}$ | NS | NS                    | 0.54 | 0.23 | 1.22 |
| rs11116242 | 84574870  | 12 | SLC6A15       | A | G | 0.10 | I | $3.32 \times 10^{-1}$ | NS | NS                    | 0.78 | 0.47 | 1.30 |
| rs1482429  | 84574961  | 12 | SLC6A15       | T | C | 0.50 | I | $2.24 \times 10^{-3}$ | NS | $1.22 \times 10^{-2}$ | 0.64 | 0.48 | 0.85 |
| rs11058065 | 125683903 | 12 | AACS          | A | G | 0.32 | G | $1.37 \times 10^{-1}$ | NS | NS                    | 1.26 | 0.93 | 1.71 |
| rs35050183 | 125685296 | 12 | AACS          | C | T | 0.38 | G | $4.92 \times 10^{-2}$ | NS | NS                    | 1.34 | 1.00 | 1.80 |
| rs73233312 | 125685471 | 12 | AACS          | T | C | 0.06 | G | $8.86 \times 10^{-4}$ | NS | $1.07 \times 10^{-2}$ | 0.26 | 0.10 | 0.67 |
| rs4448747  | 125696722 | 12 | AACS          | A | G | 0.28 | G | $2.37 \times 10^{-1}$ | NS | NS                    | 1.21 | 0.88 | 1.67 |
| rs1571888  | 125699029 | 12 | AACS          | T | C | 0.06 | G | $8.63 \times 10^{-1}$ | NS | NS                    | 1.05 | 0.59 | 1.88 |
| rs4765231  | 125704267 | 12 | AACS          | T | G | 0.16 | G | $4.06 \times 10^{-1}$ | NS | NS                    | 1.18 | 0.80 | 1.73 |
| rs7970411  | 125706376 | 12 | AACS          | G | T | 0.06 | G | $4.82 \times 10^{-1}$ | NS | NS                    | 1.25 | 0.68 | 2.30 |
| rs4442602  | 125710951 | 12 | AACS          | T | C | 0.29 | G | $1.32 \times 10^{-3}$ | NS | $1.44 \times 10^{-2}$ | 1.66 | 1.22 | 2.25 |
| rs80131194 | 125711302 | 12 | AACS          | C | T | 0.11 | G | $1.19 \times 10^{-1}$ | NS | NS                    | 0.68 | 0.42 | 1.12 |
| rs4765028  | 125712728 | 12 | AACS          | G | T | 0.19 | G | $2.69 \times 10^{-1}$ | NS | NS                    | 1.23 | 0.86 | 1.76 |
| rs10846850 | 125715717 | 12 | AACS          | T | C | 0.13 | G | $7.65 \times 10^{-4}$ | NS | $1.04 \times 10^{-2}$ | 0.43 | 0.26 | 0.73 |
| rs7133139  | 125719088 | 12 | AACS          | A | G | 0.23 | G | $1.41 \times 10^{-1}$ | NS | NS                    | 1.29 | 0.92 | 1.80 |
| rs11058097 | 125721061 | 12 | TMEM132B/AACS | T | C | 0.18 | G | $1.87 \times 10^{-1}$ | NS | NS                    | 1.28 | 0.89 | 1.85 |
| rs75393874 | 125724864 | 12 | TMEM132B/AACS | C | T | 0.03 | G | $7.97 \times 10^{-1}$ | NS | NS                    | 0.89 | 0.37 | 2.13 |
| rs12818316 | 125737328 | 12 | TMEM132B/AACS | T | C | 0.27 | G | $1.00 \times 10^{-2}$ | NS | $4.54 \times 10^{-2}$ | 1.52 | 1.11 | 2.08 |
| rs61943077 | 125746191 | 12 | TMEM132B/AACS | A | G | 0.36 | G | $1.10 \times 10^{-2}$ | NS | $4.79 \times 10^{-2}$ | 0.67 | 0.49 | 0.92 |
| rs4765236  | 125746249 | 12 | TMEM132B/AACS | C | T | 0.05 | G | $1.20 \times 10^{-1}$ | NS | NS                    | 1.65 | 0.89 | 3.08 |
