# Supplementary material for: Fine-scale haplotype mapping of MUT, AACS, SLC6A15 and PRKCA genes indicates association with insulin resistance of metabolic syndrome and relationship with branched chain amino acid metabolism or regulation
Source: PubMed Central journal article supplement (PMC6435171; doi:10.1371/journal.pone.0214122), 2019-03-26
Supplement: pone.0214122.s007.pdf [file pone.0214122.s007.pdf]

| MUT            | HaplotypeID | Frequency | P-value ( $\chi^2$ )    |
|----------------|-------------|-----------|-------------------------|
| <b>Block 2</b> |             |           |                         |
| CAAAAACGC      | B2_H1       | 0.284     | 8.80 X 10 <sup>-1</sup> |
| CAAAAACGT      | B2_H2       | 0.002     | 6.12 X 10 <sup>-1</sup> |
| CAAAAGCGC      | B2_H3       | 0.001     | 1.87 X 10 <sup>-1</sup> |
| CAAAAACGC      | B2_H4       | 0.046     | 1.10 X 10 <sup>-1</sup> |
| CCAAAGCGC      | B2_H5       | 0.023     | 4.79 X 10 <sup>-1</sup> |
| CCAAAGTGC      | B2_H6       | 0.077     | 8.97 X 10 <sup>-2</sup> |
| CCAAGACGC      | B2_H7       | 0.043     | 6.66 X 10 <sup>-2</sup> |
| CCAAGACGT      | B2_H8       | 0.089     | 5.86 X 10 <sup>-2</sup> |
| CCAAGGTGC      | B2_H9       | 0.001     | 5.72 X 10 <sup>-1</sup> |
| TCGGGACGC      | B2_H10      | 0.001     | 5.50 X 10 <sup>-1</sup> |
| CCGAGACGC      | B2_H11      | 0.052     | 1.63 X 10 <sup>-1</sup> |
| CCGGGACGC      | B2_H12      | 0.128     | 6.60 X 10 <sup>-3</sup> |
| TCGAGACGC      | B2_H13      | 0.216     | 1.50 X 10 <sup>-1</sup> |
| TCGAGACGT      | B2_H14      | 0.002     | 4.75 X 10 <sup>-1</sup> |
| TCGAGACAC      | B2_H15      | 0.028     | 9.64 X 10 <sup>-1</sup> |
| TCGAGGCGC      | B2_H16      | 0.005     | 9.68 X 10 <sup>-1</sup> |
| <b>Block 3</b> |             |           |                         |
| CACTTCAC       | B3_H1       | 0.058     | 4.42 X 10 <sup>-1</sup> |
| CACTTCGC       | B3_H2       | 0.230     | 1.98 X 10 <sup>-1</sup> |
| CATGTCAC       | B3_H3       | 0.214     | 1.00 X 10 <sup>-4</sup> |
| CGCGTTGT       | B3_H4       | 0.002     | 4.84 X 10 <sup>-1</sup> |
| CGCGTCAC       | B3_H5       | 0.037     | 4.12 X 10 <sup>-1</sup> |
| CGCGTTAC       | B3_H6       | 0.190     | 8.94 X 10 <sup>-1</sup> |
| CGCGTTAT       | B3_H7       | 0.077     | 6.84 X 10 <sup>-1</sup> |
| CGCGTTGC       | B3_H8       | 0.002     | 4.66 X 10 <sup>-1</sup> |
| CGCGCCAC       | B3_H9       | 0.110     | 4.15 X 10 <sup>-2</sup> |
| CGCGCTAC       | B3_H10      | 0.001     | 5.60 X 10 <sup>-1</sup> |
| CGTGTTAC       | B3_H11      | 0.001     | 1.03 X 10 <sup>-1</sup> |
| AGCGTCAC       | B3_H12      | 0.076     | 2.02 X 10 <sup>-1</sup> |
| CGCGCCGC       | B3_H13      | 0.001     | 5.60 X 10 <sup>-1</sup> |
| <b>Block 4</b> |             |           |                         |
| ACGACCC        | B4_H1       | 0.360     | 2.68 X 10 <sup>-2</sup> |
| ACGACCT        | B4_H2       | 0.064     | 3.26 X 10 <sup>-1</sup> |
| ACGACTC        | B4_H3       | 0.138     | 5.17 X 10 <sup>-1</sup> |
| ACGGCCC        | B4_H4       | 0.055     | 2.86 X 10 <sup>-1</sup> |
| ATGACCT        | B4_H5       | 0.003     | 5.05 X 10 <sup>-1</sup> |
| ATGATCT        | B4_H6       | 0.033     | 5.77 X 10 <sup>-1</sup> |
| CCGGTCT        | B4_H7       | 0.002     | 3.86 X 10 <sup>-1</sup> |
| CCGACCT        | B4_H8       | 0.217     | 1.40 X 10 <sup>-3</sup> |
| CTGACCC        | B4_H9       | 0.001     | 5.55 X 10 <sup>-1</sup> |
| CCGGCCT        | B4_H10      | 0.002     | 5.70 X 10 <sup>-1</sup> |
| CCAACCT        | B4_H11      | 0.017     | 5.65 X 10 <sup>-2</sup> |
| CTGACCT        | B4_H12      | 0.102     | 1.71 X 10 <sup>-1</sup> |
| CTGATTC        | B4_H13      | 0.001     | 5.40 X 10 <sup>-1</sup> |
| CTGATCT        | B4_H14      | 0.005     | 8.77 X 10 <sup>-1</sup> |

| <b>AACS<br/>Block</b> | <b>HaplotypeID</b> | <b>Frequency</b> | <b>P-value (<math>\chi^2</math>)</b> |
|-----------------------|--------------------|------------------|--------------------------------------|
| <b>Block 17</b>       |                    |                  |                                      |
| GTC A                 | B17_H1             | 0.277            | $2.16 \times 10^{-1}$                |
| GTC G                 | B17_H2             | 0.284            | $7.01 \times 10^{-2}$                |
| GTT G                 | B17_H3             | 0.057            | $2.60 \times 10^{-3}$                |
| GCC G                 | B17_H4             | 0.057            | $2.63 \times 10^{-1}$                |
| ACC G                 | B17_H5             | 0.325            | $1.35 \times 10^{-1}$                |
| <b>Block 18</b>       |                    |                  |                                      |
| CGTCCT                | B18_H1             | 0.108            | $1.90 \times 10^{-1}$                |
| CGTCTG                | B18_H2             | 0.041            | $7.09 \times 10^{-1}$                |
| CGTCTT                | B18_H3             | 0.349            | $8.00 \times 10^{-4}$                |
| CGTTTT                | B18_H4             | 0.272            | $1.00 \times 10^{-4}$                |
| CGGCTT                | B18_H5             | 0.003            | $7.47 \times 10^{-1}$                |
| CTTCTG                | B18_H6             | 0.144            | $2.10 \times 10^{-1}$                |
| CTTTTT                | B18_H7             | 0.015            | $1.35 \times 10^{-1}$                |
| CTGCTT                | B18_H8             | 0.002            | $5.22 \times 10^{-1}$                |
| TGTCCT                | B18_H9             | 0.003            | $2.76 \times 10^{-1}$                |
| TTTCTG                | B18_H10            | 0.003            | $7.62 \times 10^{-1}$                |
| TGTTTT                | B18_H11            | 0.008            | $4.36 \times 10^{-1}$                |
| TGGCTT                | B18_H12            | 0.049            | $6.28 \times 10^{-1}$                |
| TGTCTG                | B18_H13            | 0.001            | $1.07 \times 10^{-1}$                |
| <b>Block 19</b>       |                    |                  |                                      |
| CACTCAT               | B19_H1             | 0.002            | $3.80 \times 10^{-1}$                |
| CACTCGC               | B19_H2             | 0.045            | $2.11 \times 10^{-1}$                |
| CACTTGT               | B19_H3             | 0.003            | $2.97 \times 10^{-1}$                |
| CACCCGT               | B19_H4             | 0.007            | $4.35 \times 10^{-1}$                |
| CATTCAT               | B19_H5             | 0.004            | $9.10 \times 10^{-1}$                |
| CATTCGT               | B19_H6             | 0.164            | $1.15 \times 10^{-1}$                |
| CATCCGT               | B19_H7             | 0.005            | $9.69 \times 10^{-1}$                |
| CGCTCAT               | B19_H8             | 0.345            | $1.52 \times 10^{-2}$                |
| CGCTCGT               | B19_H9             | 0.015            | $1.50 \times 10^{-2}$                |
| CGCTCGC               | B19_H10            | 0.003            | $1.25 \times 10^{-1}$                |
| CGCTTGT               | B19_H11            | 0.257            | $6.80 \times 10^{-3}$                |
| CGCCCAT               | B19_H12            | 0.006            | $9.01 \times 10^{-1}$                |
| CGCCCGT               | B19_H13            | 0.007            | $6.64 \times 10^{-1}$                |
| CGCCTGT               | B19_H14            | 0.003            | $1.55 \times 10^{-1}$                |
| CGTTCGT               | B19_H15            | 0.002            | $3.99 \times 10^{-1}$                |
| TGCTCAT               | B19_H16            | 0.004            | $5.14 \times 10^{-1}$                |
| TGCTCGT               | B19_H17            | 0.119            | $2.50 \times 10^{-3}$                |
| TGCTTGT               | B19_H18            | 0.004            | $6.32 \times 10^{-1}$                |
| CGTCCGT               | B19_H19            | 0.002            | $4.74 \times 10^{-1}$                |
| TACTTGT               | B19_H20            | 0.001            | $5.51 \times 10^{-1}$                |

**SLC6A15**

| <b>Block</b>   | <b>HaplotypeID</b> | <b>Frequency</b> | <b>P-value (<math>\chi^2</math>)</b> |
|----------------|--------------------|------------------|--------------------------------------|
| <b>Block 1</b> |                    |                  |                                      |
| GTCCAGCCC      | B1_H1              | 0.486            | 4.00 X 10 <sup>-3</sup>              |
| GTCCAGCCT      | B1_H2              | 0.015            | 4.77 X 10 <sup>-1</sup>              |
| GTCGGGGAC      | B1_H3              | 0.105            | 6.72 X 10 <sup>-1</sup>              |
| GTTGGGGAC      | B1_H4              | 0.165            | 1.93 X 10 <sup>-2</sup>              |
| ATCGGGGAC      | B1_H5              | 0.001            | 5.40 X 10 <sup>-1</sup>              |
| AACGGAGAC      | B1_H6              | 0.228            | 2.26 X 10 <sup>-1</sup>              |
| <b>Block 2</b> |                    |                  |                                      |
| CTAGGAGTCG     | B2_H1              | 0.440            | 3.00 X 10 <sup>-4</sup>              |
| CTAGGGGTCG     | B2_H2              | 0.061            | 2.74 X 10 <sup>-1</sup>              |
| TTTGGAGTTG     | B2_H3              | 0.008            | 7.54 X 10 <sup>-2</sup>              |
| TTTTGGGCTA     | B2_H4              | 0.001            | 5.40 X 10 <sup>-1</sup>              |
| TTTTGAACTA     | B2_H5              | 0.228            | 2.26 X 10 <sup>-1</sup>              |
| TTTTTAGTTG     | B2_H6              | 0.098            | 3.40 X 10 <sup>-1</sup>              |
| TCTGGAGTTG     | B2_H7              | 0.165            | 1.93 X 10 <sup>-2</sup>              |
| <b>Block 3</b> |                    |                  |                                      |
| AGCTGC         | B3_H1              | 0.293            | 7.80 X 10 <sup>-3</sup>              |
| AGCCGC         | B3_H2              | 0.044            | 1.32 X 10 <sup>-1</sup>              |
| AGTTGT         | B3_H3              | 0.277            | 2.10 X 10 <sup>-3</sup>              |
| AGTTAT         | B3_H4              | 0.098            | 3.40 X 10 <sup>-1</sup>              |
| AATTGT         | B3_H5              | 0.119            | 7.02 X 10 <sup>-1</sup>              |
| GGCTGC         | B3_H6              | 0.164            | 9.17 X 10 <sup>-2</sup>              |
| GGTTGT         | B3_H7              | 0.005            | 8.60 X 10 <sup>-1</sup>              |

**PRKCA**

| <b>Block</b>    | <b>HaplotypeID</b> | <b>Frequency</b> | <b>P-value (<math>\chi^2</math>)</b> |
|-----------------|--------------------|------------------|--------------------------------------|
| <b>Block 65</b> |                    |                  |                                      |
| AAACTTGCG       | B65_H1             | 0.002            | 5.36 X 10 <sup>-1</sup>              |
| AAAGTAGCG       | B65_H2             | 0.011            | 6.21 X 10 <sup>-1</sup>              |
| AAAGTAGGG       | B65_H3             | 0.208            | 7.09 X 10 <sup>-1</sup>              |
| AAAGTACCT       | B65_H4             | 0.015            | 8.91 X 10 <sup>-1</sup>              |
| AAAGTTGCG       | B65_H5             | 0.002            | 4.09 X 10 <sup>-1</sup>              |
| AAGGCTGCG       | B65_H6             | 0.083            | 1.79 X 10 <sup>-1</sup>              |
| AAGGCTGGG       | B65_H7             | 0.003            | 8.17 X 10 <sup>-1</sup>              |
| ATAGCTGCG       | B65_H8             | 0.005            | 1.69 X 10 <sup>-1</sup>              |
| ATAGTAGCG       | B65_H9             | 0.002            | 5.21 X 10 <sup>-1</sup>              |
| ATAGTAGGG       | B65_H10            | 0.003            | 1.13 X 10 <sup>-1</sup>              |
| ATAGTACCG       | B65_H11            | 0.002            | 4.71 X 10 <sup>-1</sup>              |
| ATAGTTGCG       | B65_H12            | 0.364            | 1.05 X 10 <sup>-1</sup>              |
| ATAGTTGCT       | B65_H13            | 0.002            | 4.02 X 10 <sup>-1</sup>              |
| GAAGTAGCG       | B65_H14            | 0.158            | 7.09 X 10 <sup>-1</sup>              |
| GAAGTACCT       | B65_H15            | 0.004            | 2.99 X 10 <sup>-2</sup>              |
| GAAGTAGCG       | B65_H16            | 0.028            | 9.75 X 10 <sup>-1</sup>              |
| GAAGTAGGG       | B65_H17            | 0.002            | 4.62 X 10 <sup>-1</sup>              |
| GAAGTACCG       | B65_H18            | 0.046            | 3.80 X 10 <sup>-3</sup>              |
| GAAGTACCT       | B65_H19            | 0.055            | 5.37 X 10 <sup>-2</sup>              |
| GAAGTTGCG       | B65_H20            | 0.001            | 5.47 X 10 <sup>-1</sup>              |
| GTAGTACCG       | B65_H21            | 0.001            | 5.41 X 10 <sup>-1</sup>              |

**Block 66**

|               |         |       |                       |
|---------------|---------|-------|-----------------------|
| CGACCCCACCACG | B66_H1  | 0.002 | $4.30 \times 10^{-1}$ |
| CGACCTCGCCACG | B66_H2  | 0.004 | $8.96 \times 10^{-1}$ |
| CGACCTCGCCACA | B66_H3  | 0.001 | $5.40 \times 10^{-1}$ |
| CGACTCCACCACG | B66_H4  | 0.072 | $2.46 \times 10^{-2}$ |
| CGATCCCACCACA | B66_H5  | 0.214 | $8.88 \times 10^{-1}$ |
| CTACTCTACGATG | B66_H6  | 0.002 | $5.30 \times 10^{-1}$ |
| CGGCCTCGGCGCA | B66_H7  | 0.398 | $1.57 \times 10^{-2}$ |
| CGGCCTCGGCGTA | B66_H8  | 0.004 | $6.13 \times 10^{-1}$ |
| CTACTCTACGACG | B66_H9  | 0.062 | $2.92 \times 10^{-1}$ |
| CTATCCCACCACA | B66_H10 | 0.001 | $1.02 \times 10^{-1}$ |
| TGACCCCACCATG | B66_H11 | 0.009 | $8.69 \times 10^{-1}$ |
| TGACCTCGCCACG | B66_H12 | 0.075 | $4.31 \times 10^{-2}$ |
| TGACCTCGCCATG | B66_H13 | 0.156 | $6.51 \times 10^{-1}$ |

**Block 92**

|       |        |       |                       |
|-------|--------|-------|-----------------------|
| GCGAA | B92_H1 | 0.416 | $3.27 \times 10^{-2}$ |
| GCGAG | B92_H2 | 0.453 | $1.04 \times 10^{-1}$ |
| GCGGA | B92_H3 | 0.002 | $3.86 \times 10^{-1}$ |
| GTGGG | B92_H4 | 0.068 | $2.25 \times 10^{-2}$ |
| ACGAG | B92_H5 | 0.003 | $8.15 \times 10^{-1}$ |
| ACAAG | B92_H6 | 0.058 | $7.00 \times 10^{-4}$ |

**Block 93**

|             |        |       |                       |
|-------------|--------|-------|-----------------------|
| AAGCACGGCCA | B93_H1 | 0.001 | $1.03 \times 10^{-1}$ |
| AAGTACGAACA | B93_H2 | 0.068 | $4.66 \times 10^{-2}$ |
| AAGTACGGACA | B93_H3 | 0.001 | $5.40 \times 10^{-1}$ |
| AGGTACGAACA | B93_H4 | 0.001 | $1.03 \times 10^{-1}$ |
| GGGCGCGGCTG | B93_H5 | 0.875 | $7.08 \times 10^{-1}$ |
| GGACGTTGCTG | B93_H6 | 0.054 | $1.60 \times 10^{-3}$ |

---
